# Supplementary material for: Integrative Analysis of Identifying Methylation-Driven Genes Signature Predicts Prognosis in Colorectal Carcinoma
Source: PubMed Central journal article supplement (PMC8231008; doi:10.3389/fonc.2021.629860), 2021-06-11
Supplement: DataSheet_1.pdf [file DataSheet_1.pdf]

## *Supplementary Material for*

# **Integrative analysis of identifying methylation-driven genes signature predicts prognosis in colorectal carcinoma**

## **1 List of Supplementary Material**

### **I Supplementary Figures**

Supplementary Figure S1: Flowchart of the research.

Supplementary Figure S2: Correlation between DNA methylation and gene expression of *ANXA9*, *BATF*, *RBPI1*, and *SERPINA1* in the training dataset and validation dataset.

Supplementary Figure S3: The difference of expression levels of four methylation-driven genes between tumor tissue and normal tissue.

Supplementary Figure S4: Validation of four-gene risk score model in the GEO dataset.

Supplementary Figure S5: Kaplan–Meier and ROC analyses of CRC patients based on different age, gender, and TNM staging subgroups in the training set.

Supplementary Figure S6: Kaplan–Meier and ROC analyses of CRC patients based on different age, gender, and TNM staging subgroups in the testing set.

Supplementary Figure S7: Comparison of ROC curves between the signature and other known biomarkers in predicting 8-year OS of CRC patients.

Supplementary Figure S8: Gene set enrichment analysis of candidate four methylation-driven genes.

### **II Supplementary Tables**

Supplementary Table S1: 143 epigenetic drivers were identified by MethylMix.

Supplementary Table S2: Identification of six methylation-driven genes by multivariable Cox regression analysis.

Supplementary Table S3: Compared the overall survival prediction and AUC values of 63 different combined models in the training set.

Supplementary Table S4: The C-index of TNM staging system and nomograms.

Supplementary Table S5: Compared the prognostic effect of four methylation-driven genes signature with other partially known biomarkers.

## I Supplementary Figures

### Supplementary Figure Legends

**Supplementary Figure S1. Flowchart of the research.** Identifying and validating methylation-driven genes, developing the risk score model and analyzing the efficiency of the signature to predict prognostic outcomes. TCGA, The Cancer Genome Atlas; ROC, receiver operating characteristic; AUC, area under the curve; GEO, The Gene Expression Omnibus

**Supplementary Figure S2. Correlation between DNA methylation and gene expression of *ANXA9*, *BATF*, *RBPI*, and *SERPINA1* in the training dataset and validation dataset.** *ANXA9*, Annexin A family member 9; *BATF*, Basic Leucine Zipper ATF-Like Transcription Factor; *RBPI*, Retinol Binding Protein 1; *SERPINA1*, Serpin family A member 1. The vertical axis and the horizontal axis denote the mRNA level and DNA methylation level, respectively

**Supplementary Figure S3. The difference of expression levels of four methylation-driven genes between tumor tissue and normal tissue.**

**Supplementary Figure S4. Validation of four-gene risk score model in the GEO dataset.** (A) Distribution of risk scores in the high-risk and low-risk subgroups. (B) Survival overview in two high-risk and low-risk groups. (C) Heatmap of the four-gene expression profiles corresponding risk scores in the high-risk and low-risk subgroups in the GEO database. (D) Comparison of OS between the high-risk score and low-risk score groups. OS, overall survival

**Supplementary Figure S5. Kaplan–Meier and ROC analyses of CRC patients based on different age, gender, and TNM staging subgroups in the training set.** Kaplan–Meier analysis was performed to estimate the differences in OS between the low-risk and high-risk patients. ROC curves of the methylation-driven gene signature were used to demonstrate the sensitivity and specificity in predicting the OS of CRC patients. OS, overall survival; ROC, receiver operating characteristic; CRC, colorectal cancer

**Supplementary Figure S6. Kaplan–Meier and ROC analyses of CRC patients based on different age, gender, and TNM staging subgroups in the testing set.** Kaplan–Meier analysis was performed to estimate the differences in OS between the low-risk and high-risk patients. ROC curves of the methylation-driven gene signature were used to demonstrate the sensitivity and specificity in predicting the OS of CRC patients. OS, overall survival; ROC, receiver operating characteristic; CRC, colorectal cancer

**Supplementary Figure S7. Comparison of ROC curves between the signature and other known biomarkers in predicting 8-year OS of CRC patients.** OS, overall survival; ROC, receiver operating characteristic; CRC, colorectal cancer

**Supplementary Figure S8. Gene set enrichment analysis of candidate four methylation-driven genes.** (A, B) GO (biological process) and KEGG pathway of *BATF*. (C, D) GO (biological process) and KEGG pathway of *PHYHIPL*. (E, F) GO (biological process) and KEGG pathway of *PNPLA4*. (G, H) GO (biological process) and KEGG pathway of *RBPI*. KEGG, Kyoto Encyclopedia of Genes and Genomes; GO, Gene Ontology; NES, normalized enrichment score; FDR, false discovery rate.

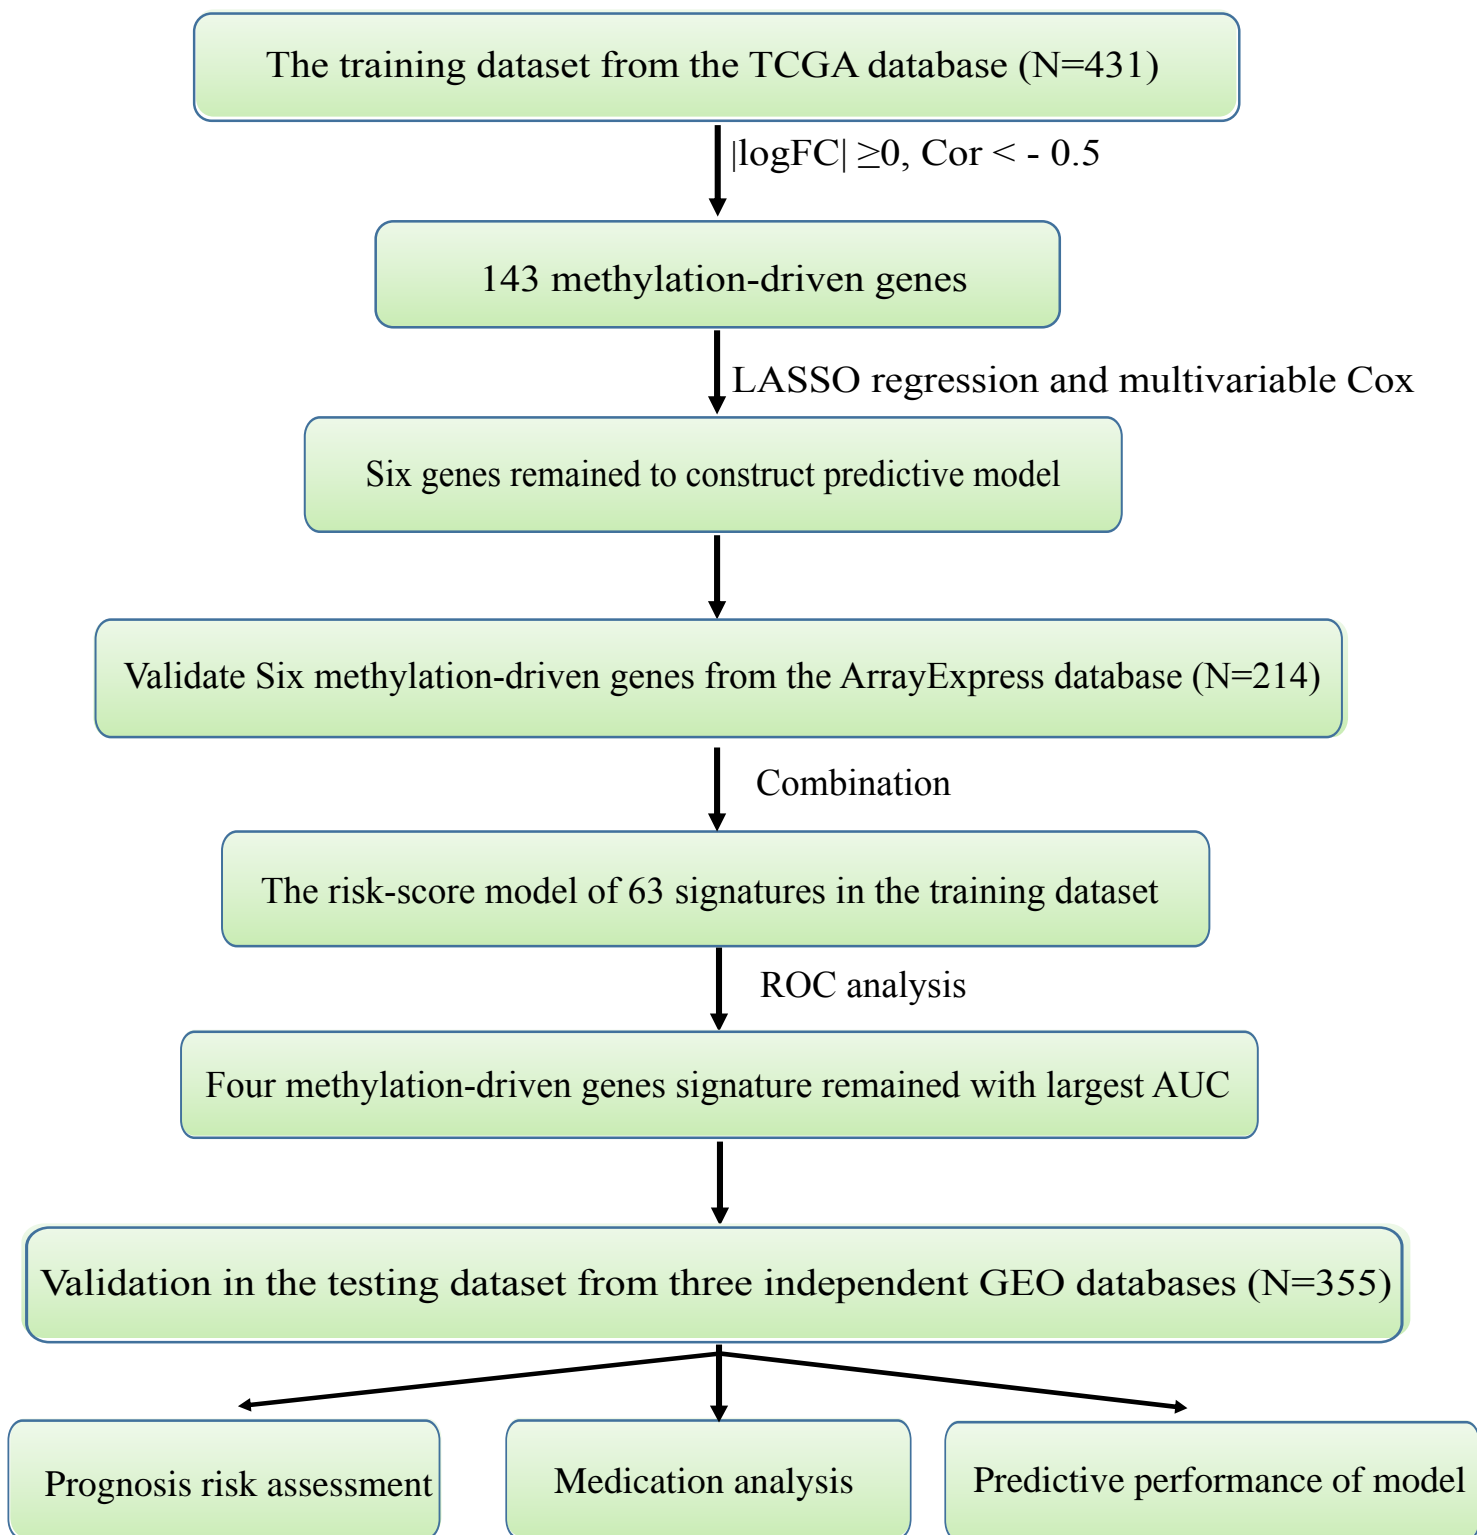

Supplementary Figure S1

## Training Dataset

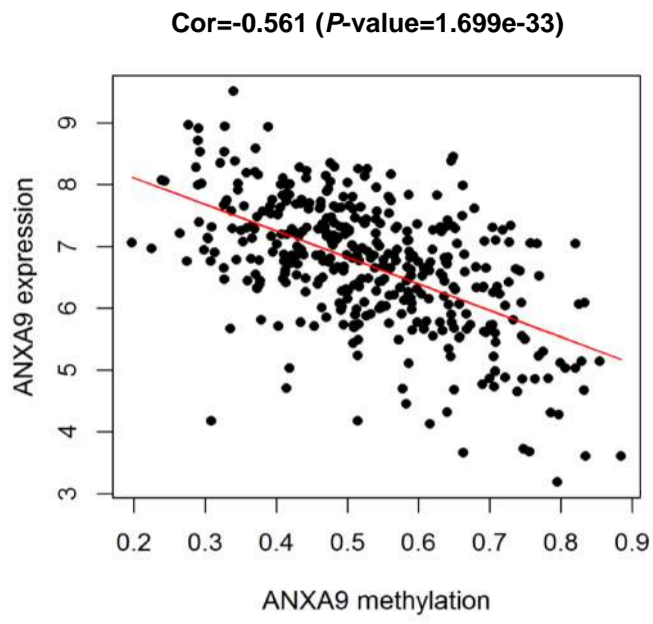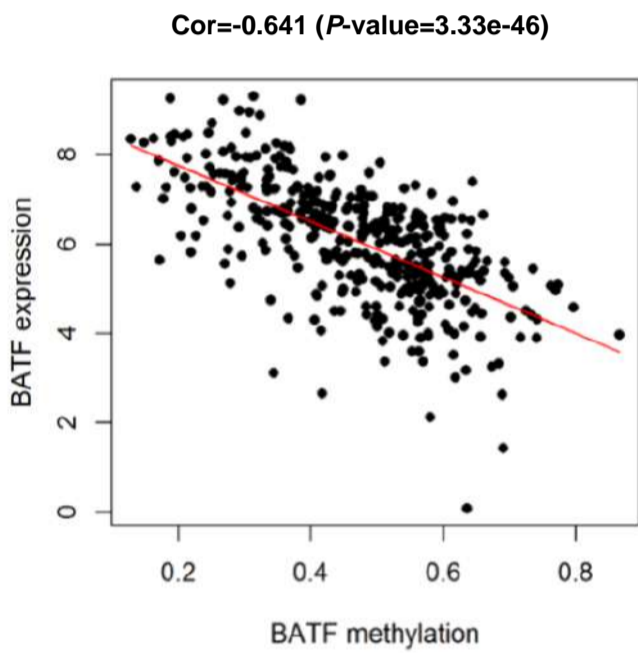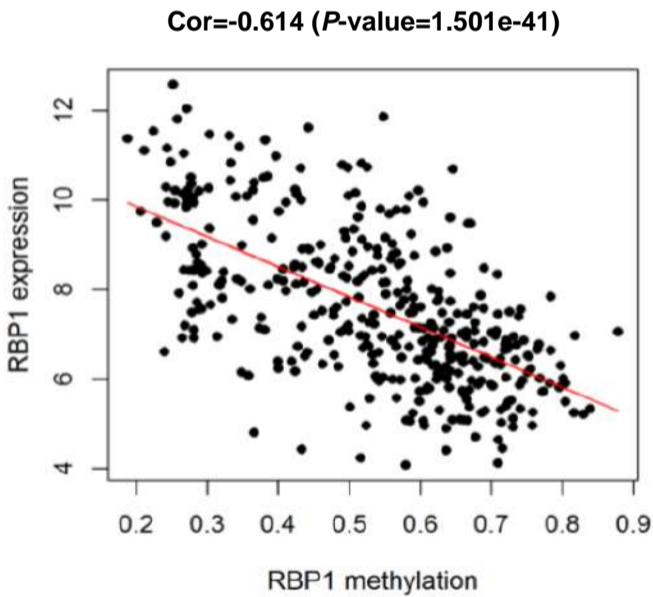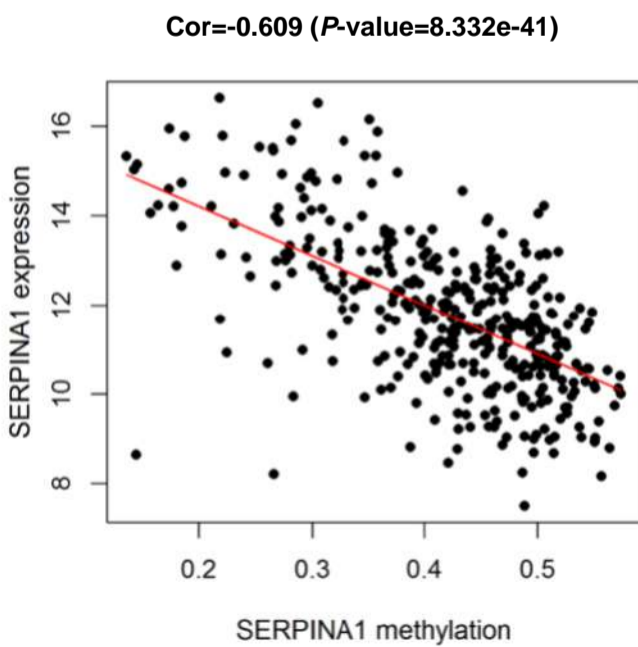

## Validation Dataset

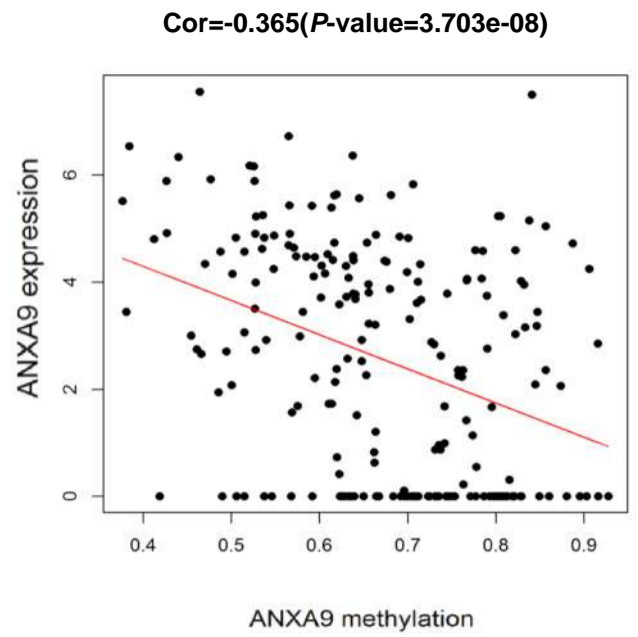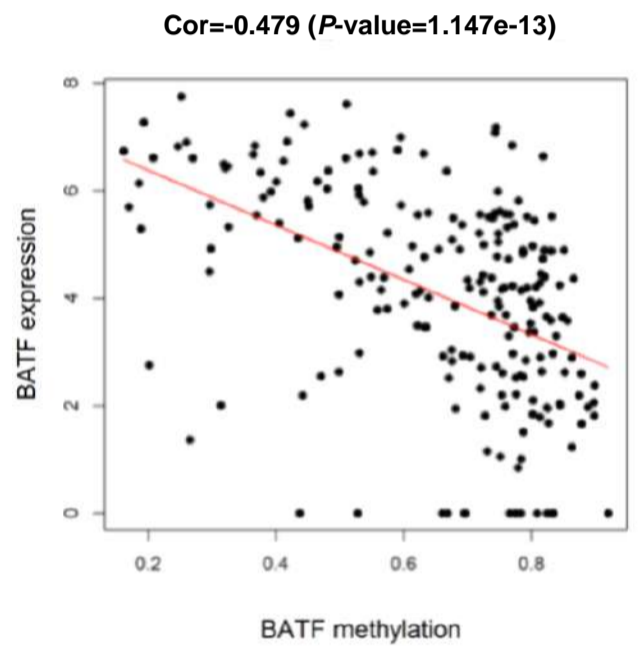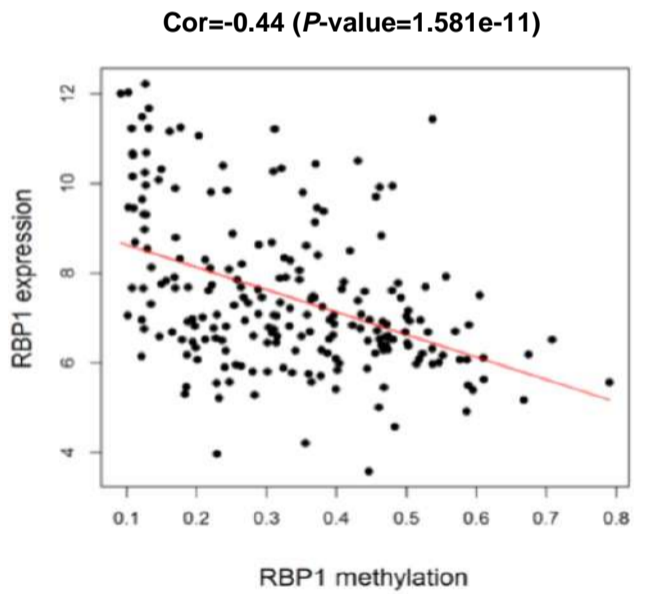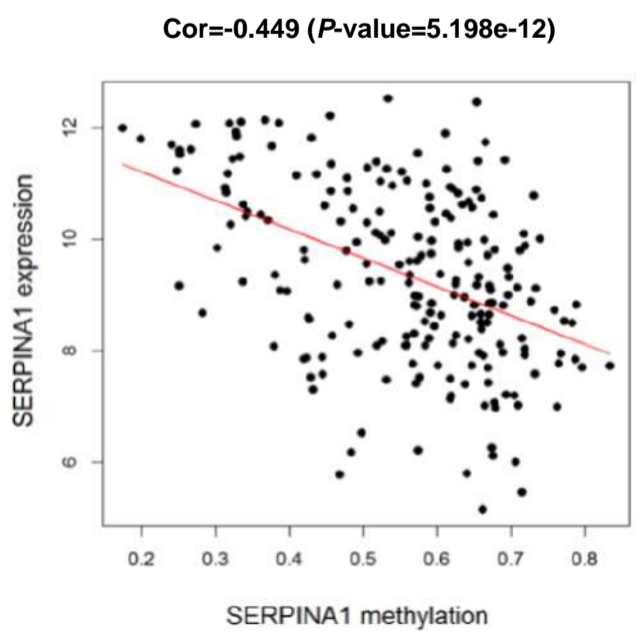

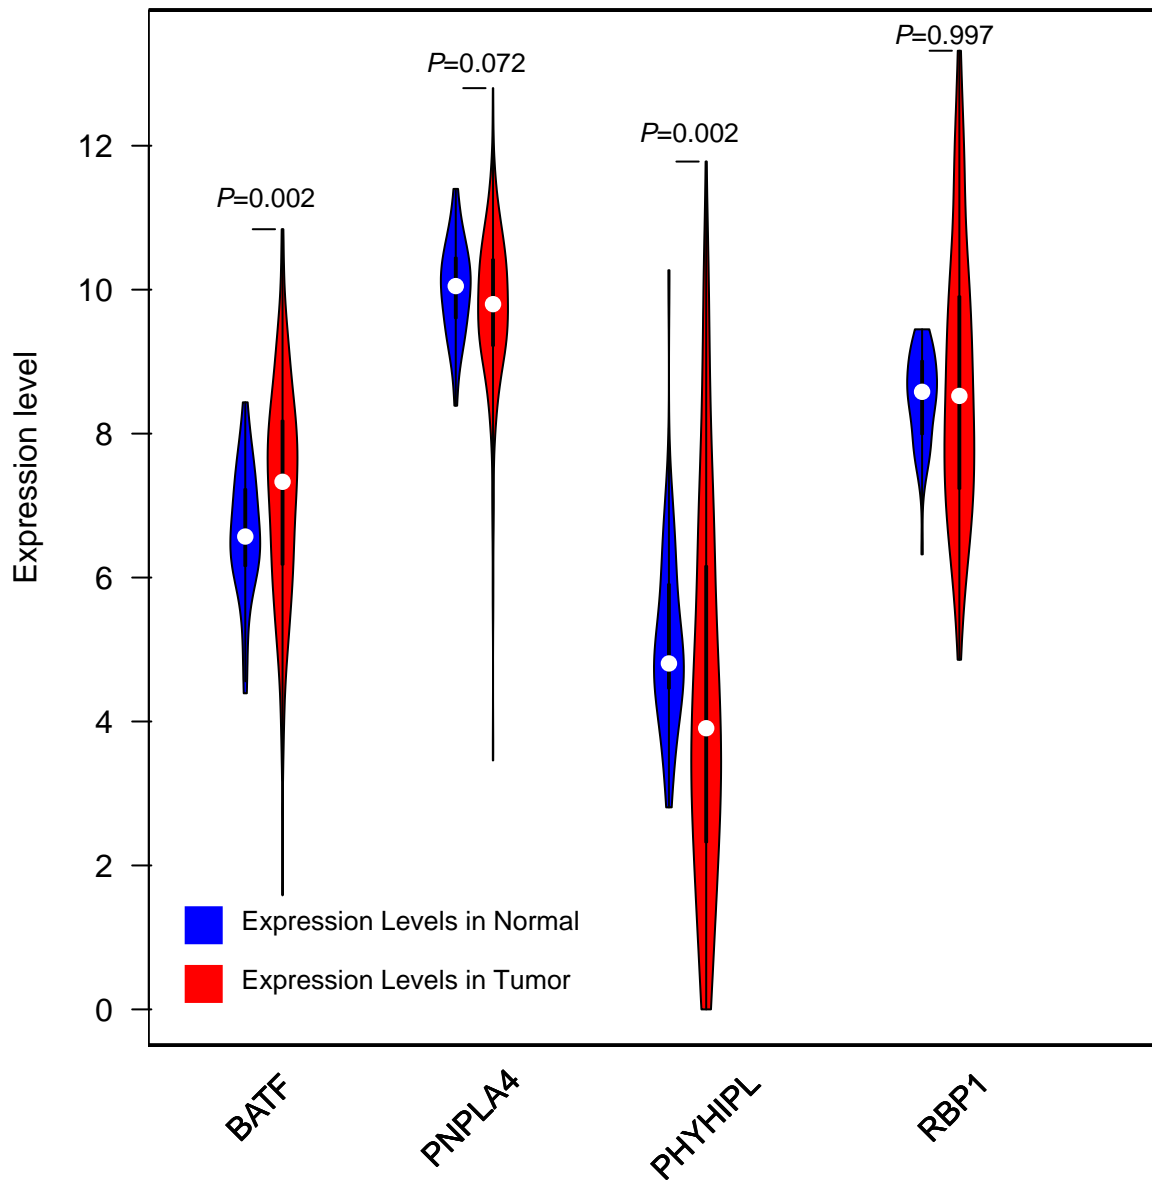

Supplementary Figure S3

**A**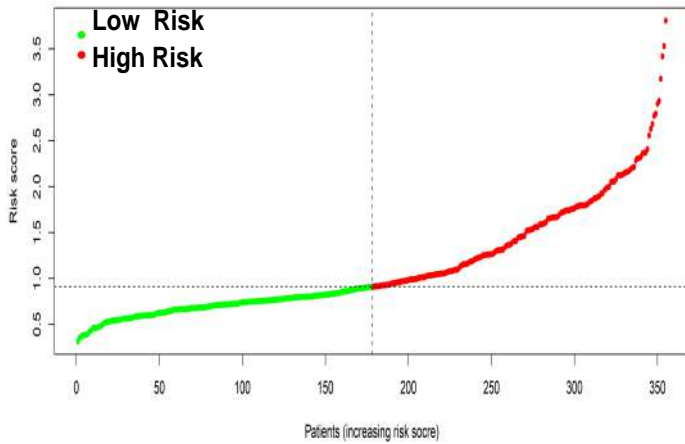**B**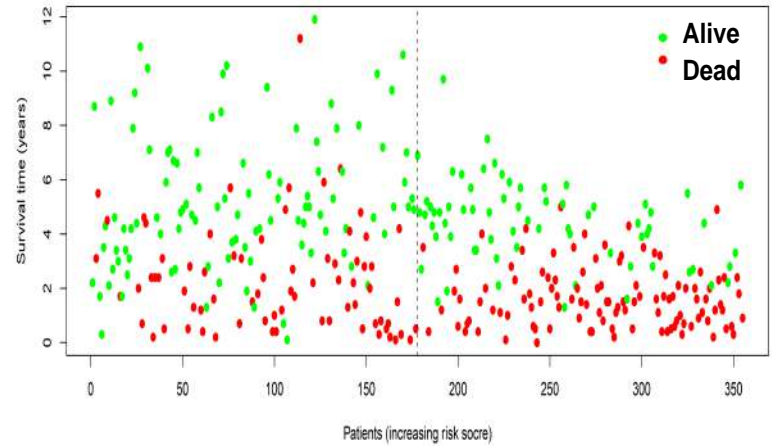**C**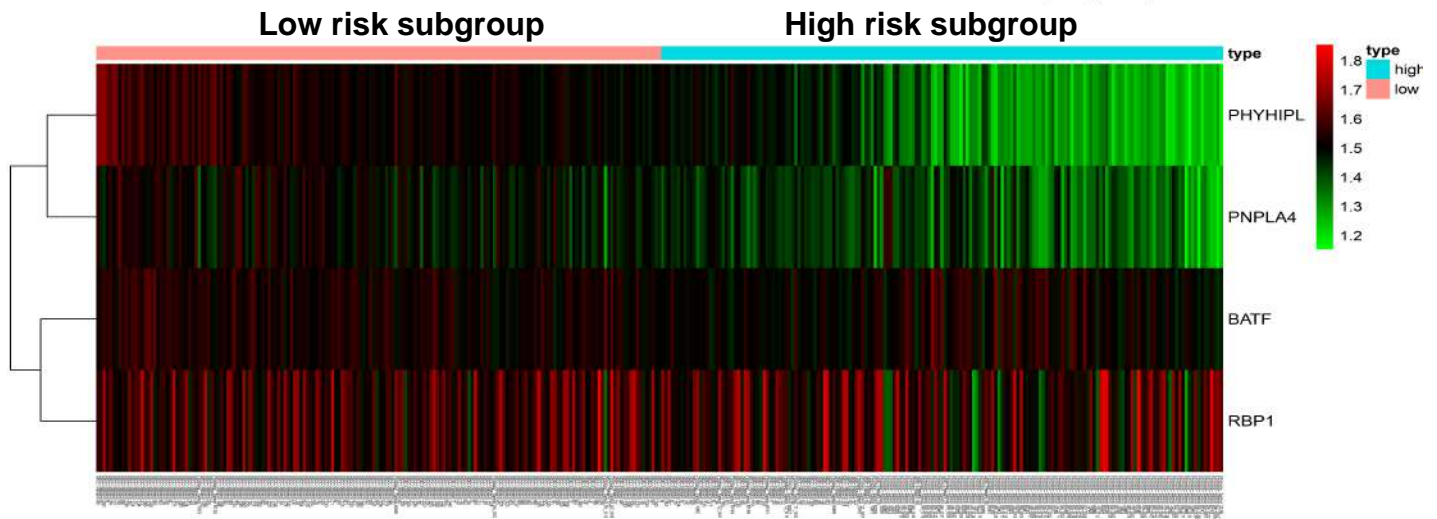**D**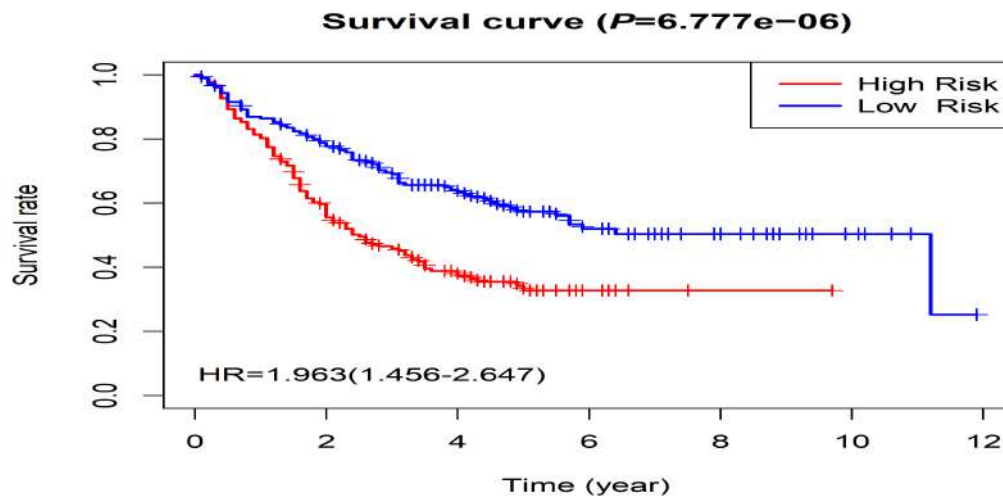

Supplementary Figure S4

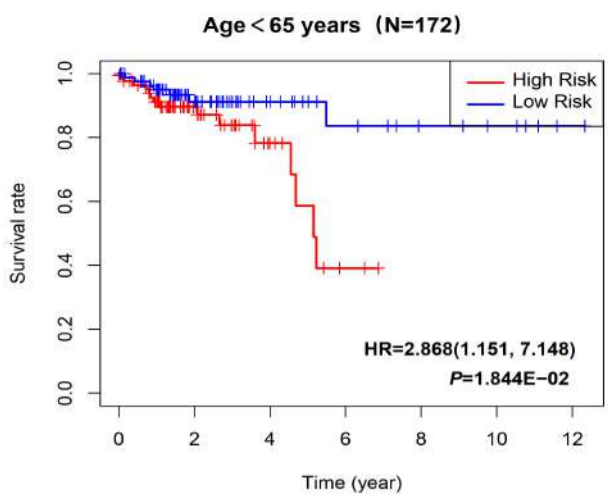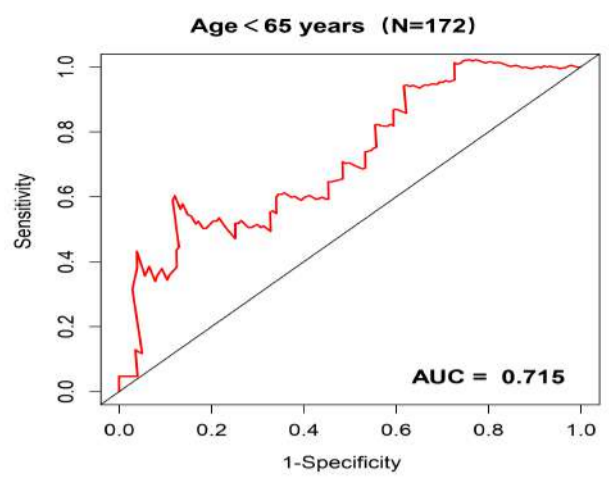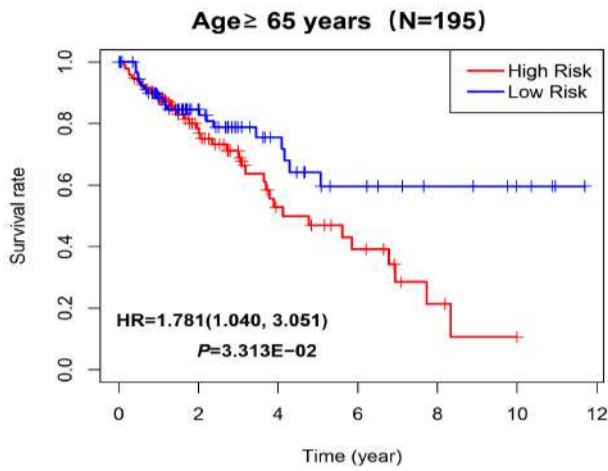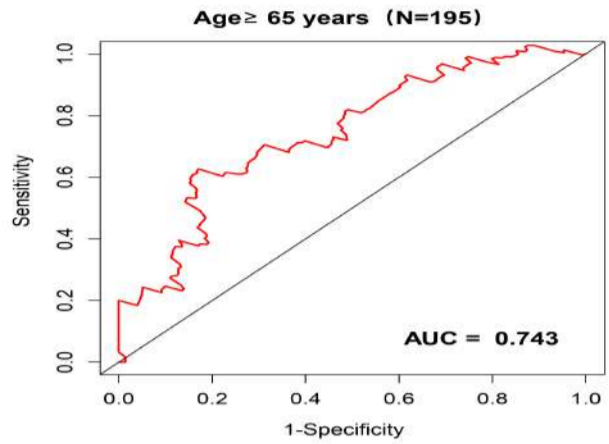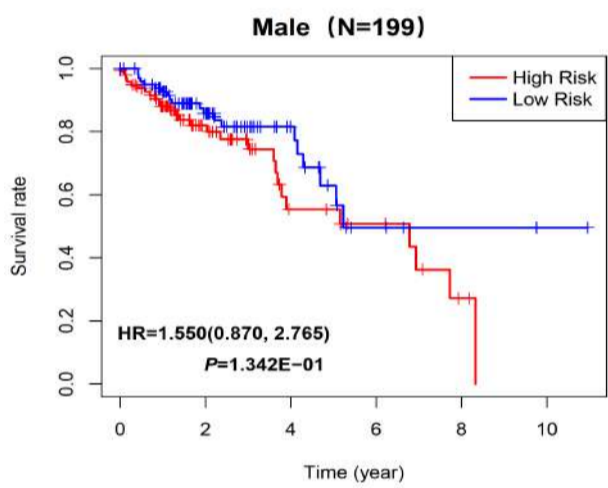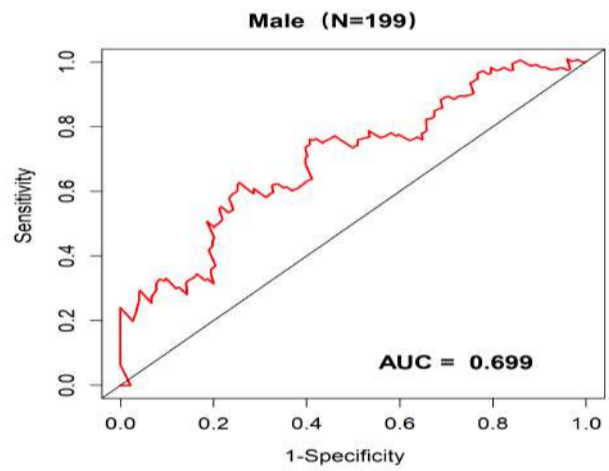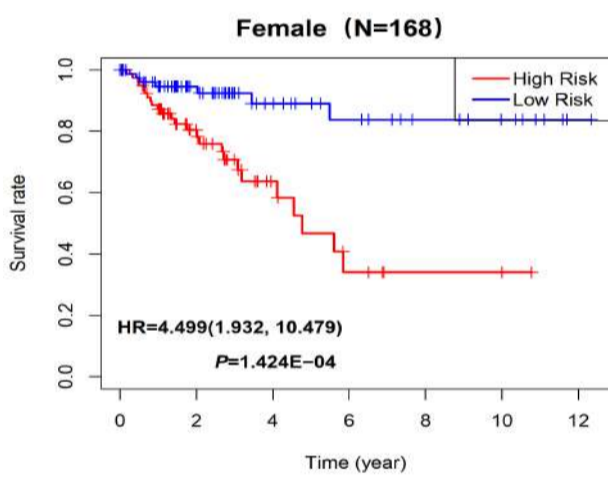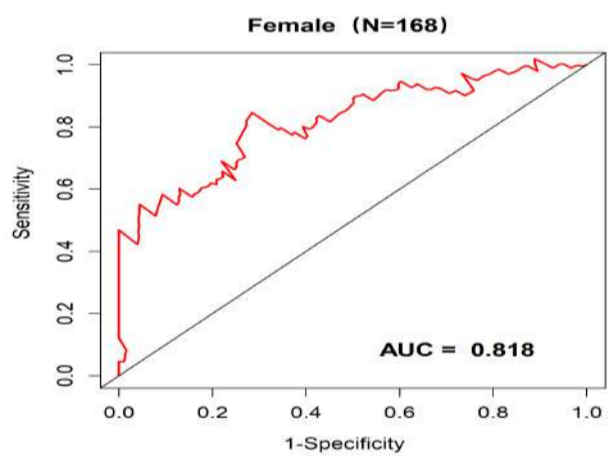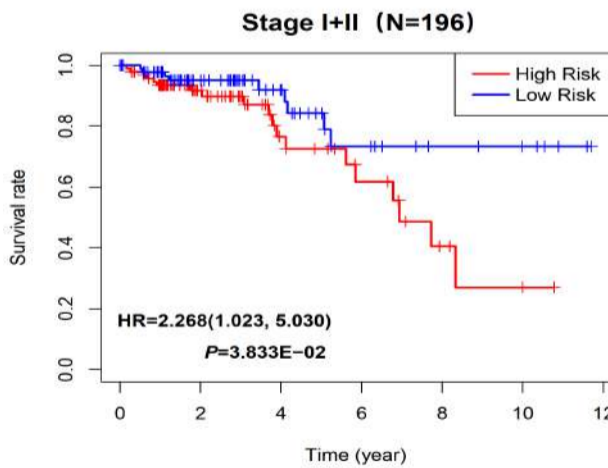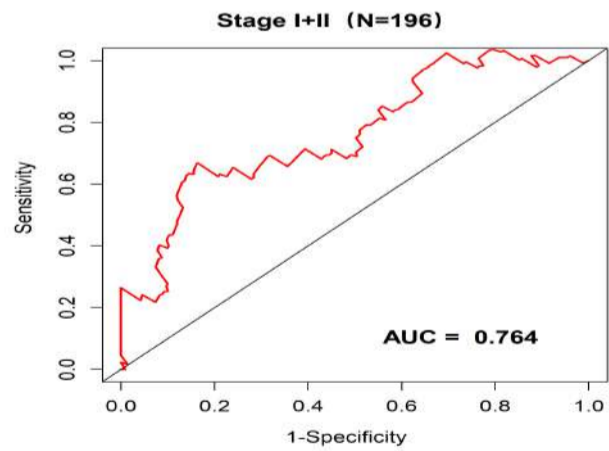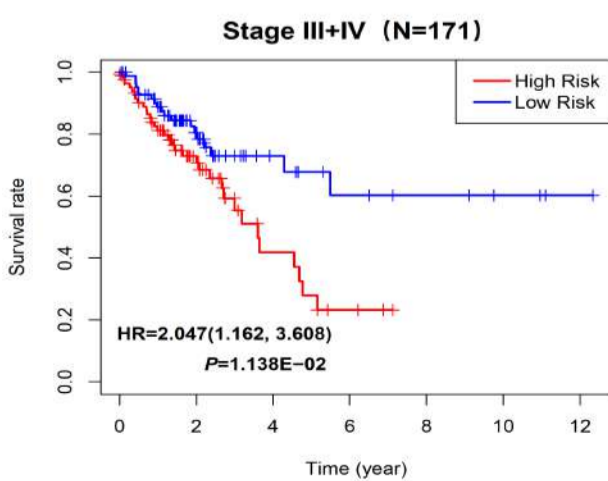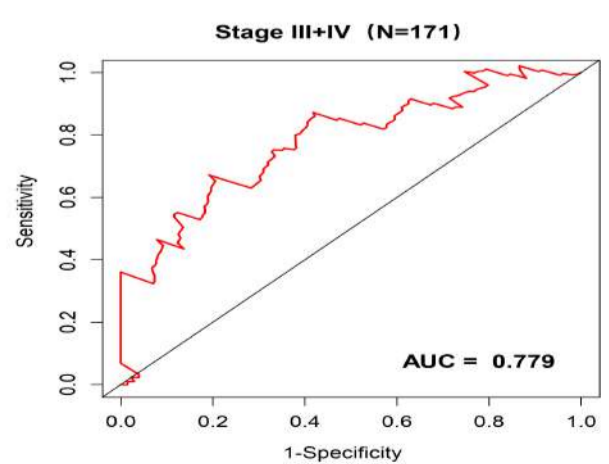

Supplementary Figure S5

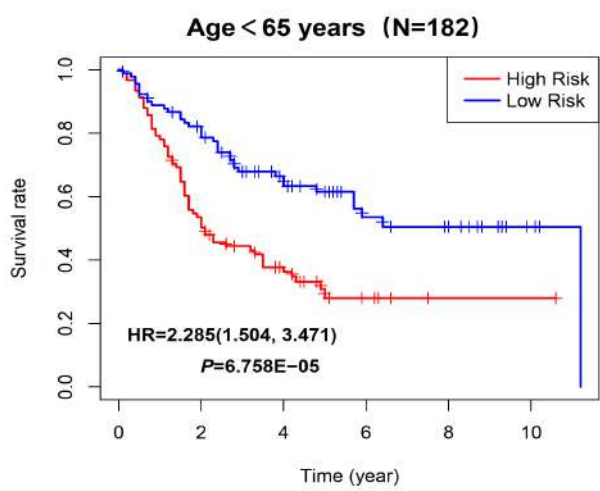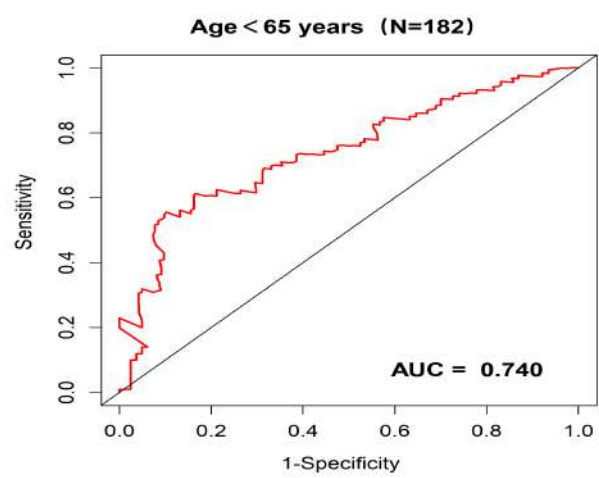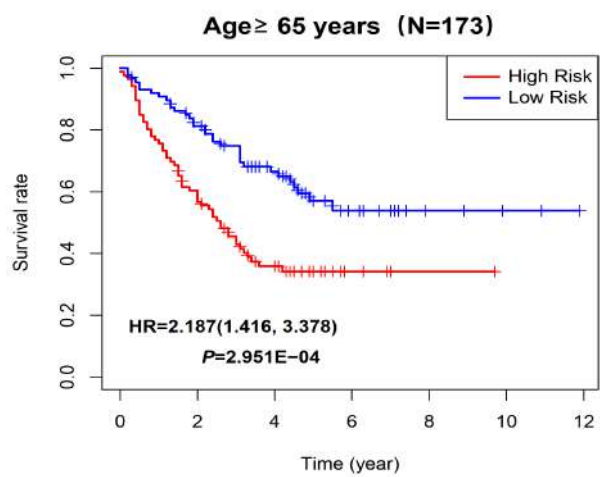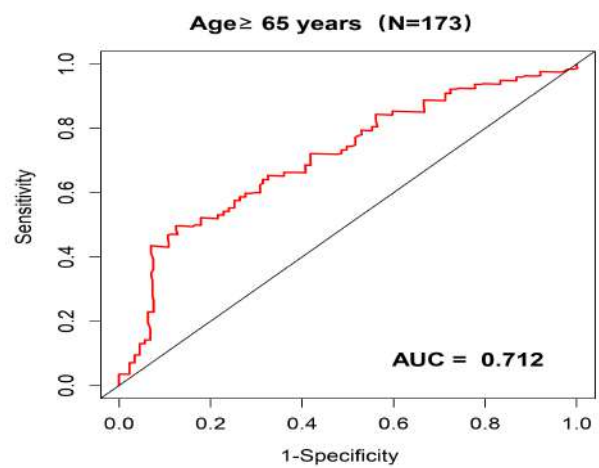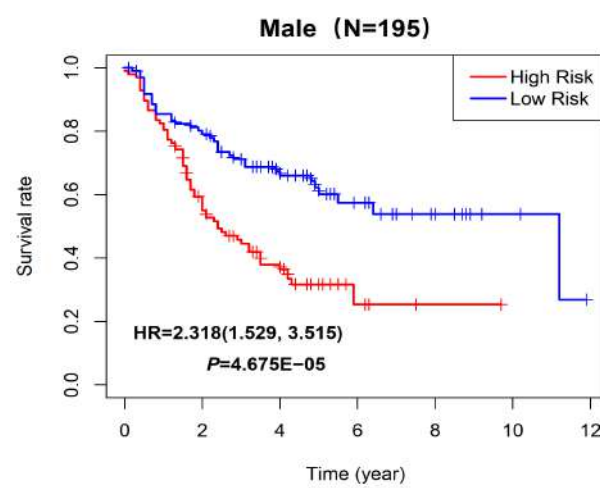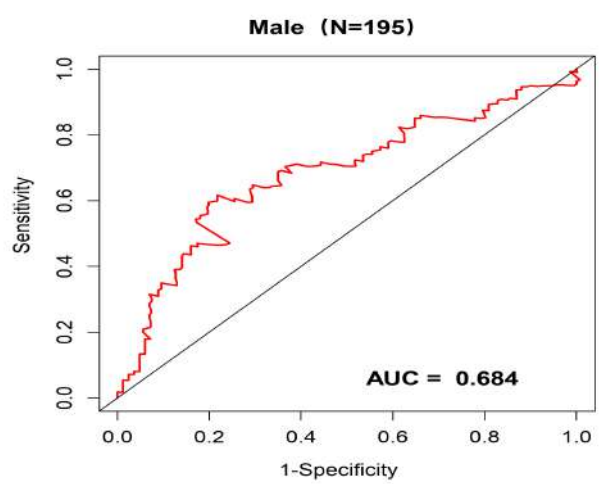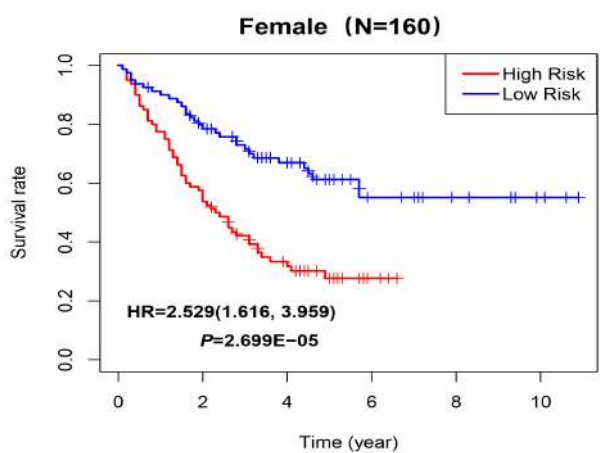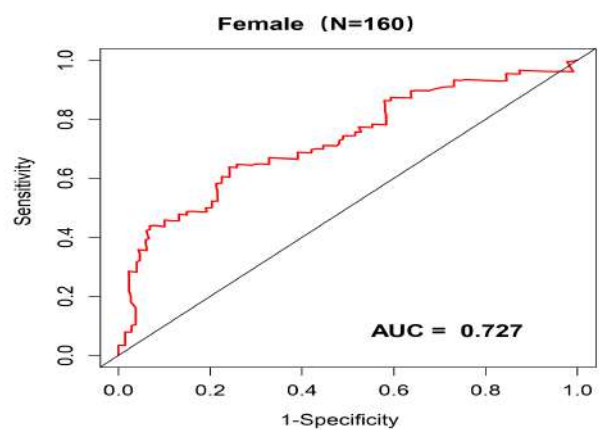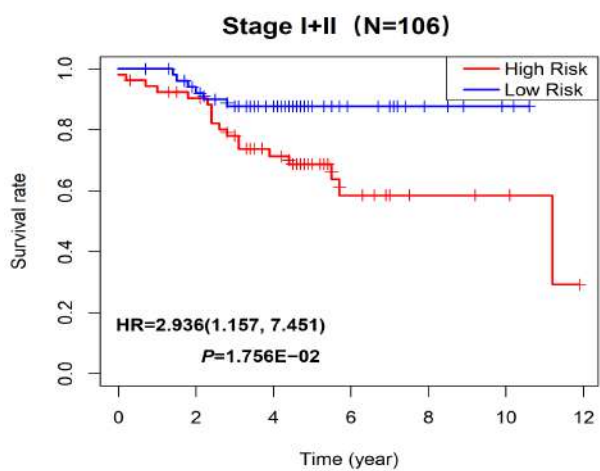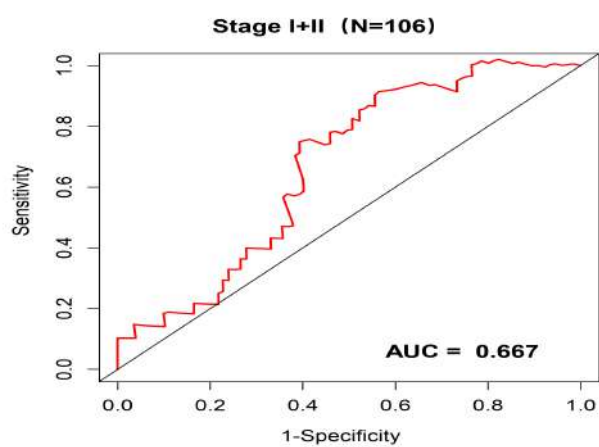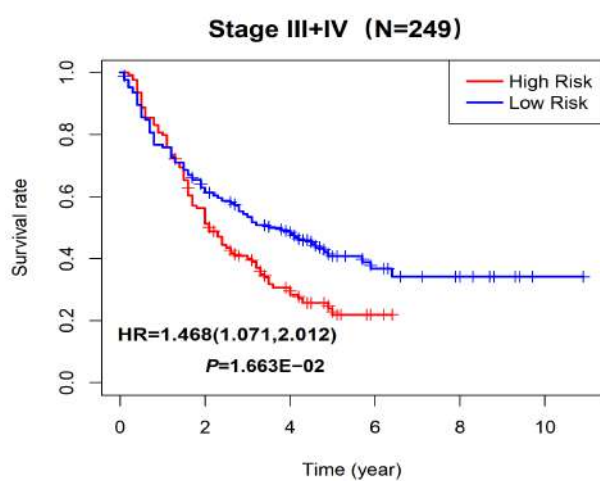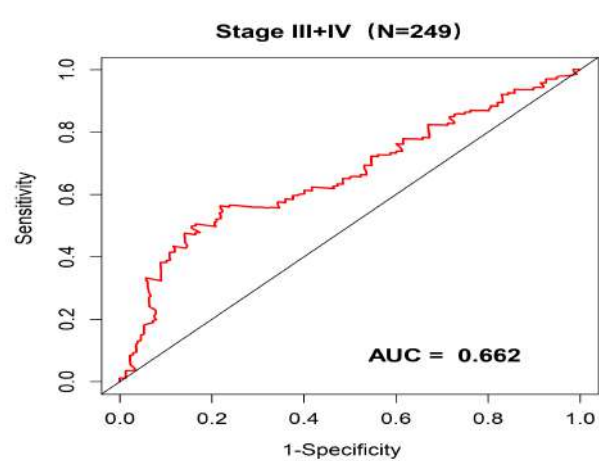

Supplementary Figure S6



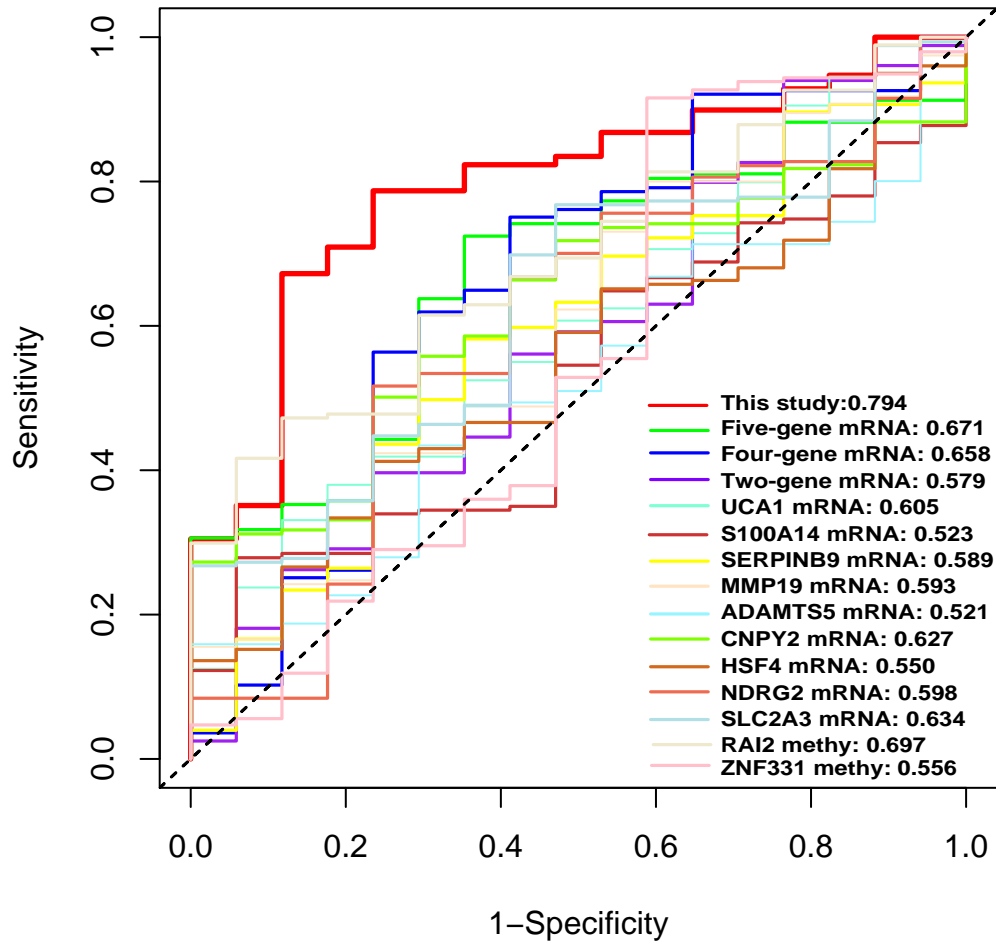

**Supplementary Figure S7**

**A**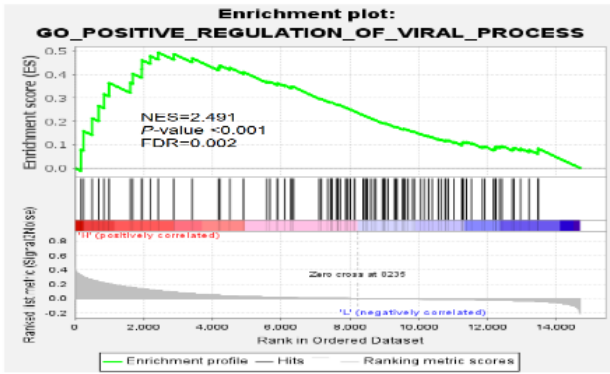**BATF****B**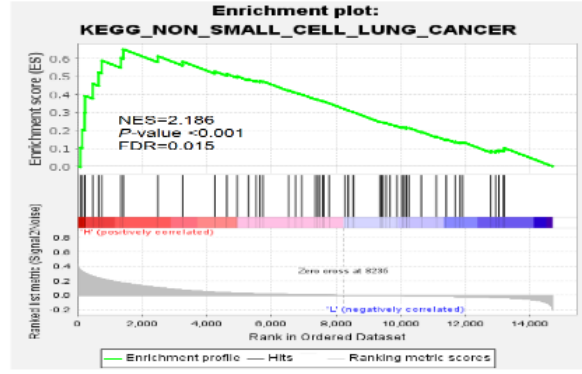**BATF****C**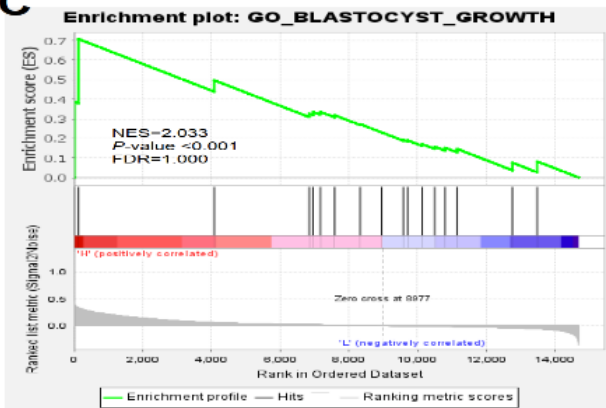**PHYHIPL****D**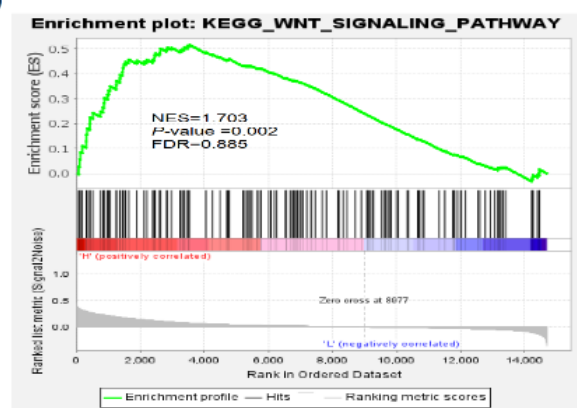**PHYHIPL****E**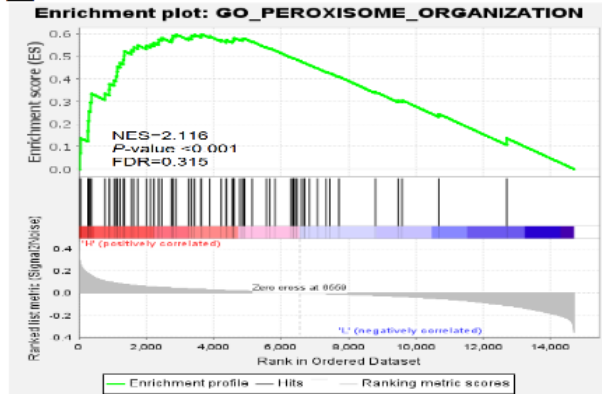**PNPLA4****F**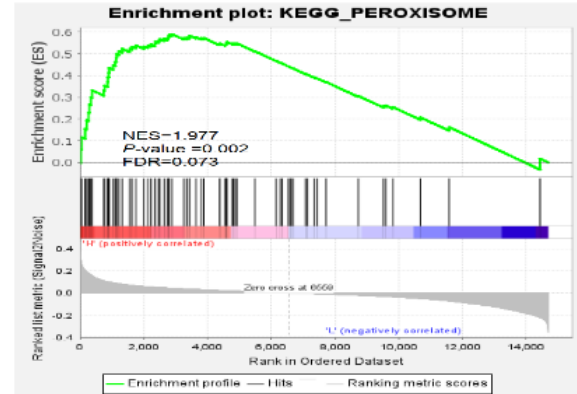**PNPLA4****G**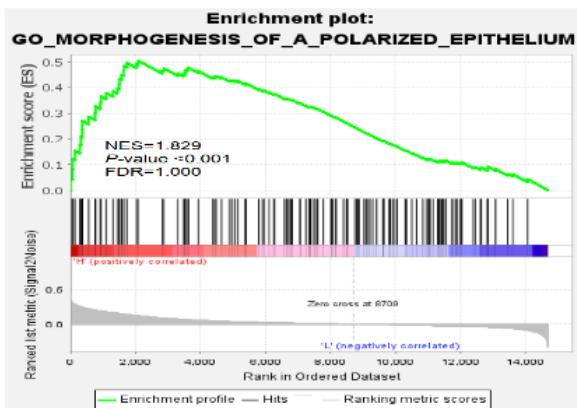**RBP1****H**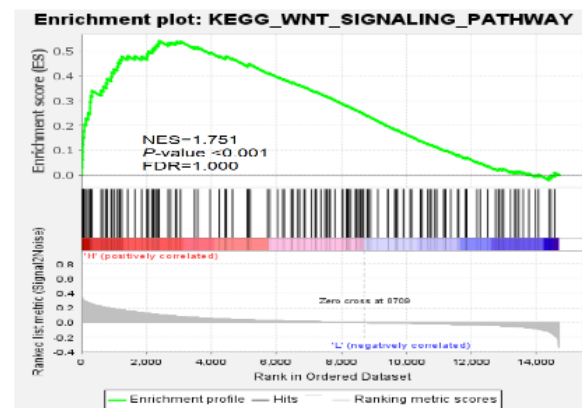**RBP1**

Supplementary Figure S8

## II Supplementary Tables

**Table S1. 143 epigenetic drivers were identified by MethylMix.**

| <b>Gene Symbol</b> | <b>NormalMean</b> | <b>TumorMean</b> | <b>logFC</b> | <b>P-Value</b> | <b>adjust P-Value</b> | <b>cor</b> | <b>cor P-value</b> |
|--------------------|-------------------|------------------|--------------|----------------|-----------------------|------------|--------------------|
| ABCC2              | 0.736             | 0.618            | -0.253       | 0.000          | 0.000                 | -0.583     | 0.000              |
| ADAL               | 0.059             | 0.094            | 0.686        | 0.000          | 0.015                 | -0.559     | 0.000              |
| AIM2               | 0.724             | 0.454            | -0.672       | 0.000          | 0.000                 | -0.514     | 0.000              |
| AKR1B1             | 0.130             | 0.473            | 1.868        | 0.000          | 0.000                 | -0.620     | 0.000              |
| ANO6               | 0.083             | 0.110            | 0.406        | 0.000          | 0.000                 | -0.508     | 0.000              |
| ANXA9              | 0.702             | 0.530            | -0.405       | 0.000          | 0.000                 | -0.561     | 0.000              |
| AQP5               | 0.197             | 0.481            | 1.292        | 0.000          | 0.000                 | -0.628     | 0.000              |
| ARHGDI3            | 0.781             | 0.550            | -0.506       | 0.000          | 0.000                 | -0.519     | 0.000              |
| B3GALNT1           | 0.209             | 0.383            | 0.874        | 0.000          | 0.000                 | -0.510     | 0.000              |
| BATF               | 0.589             | 0.470            | -0.325       | 0.000          | 0.000                 | -0.641     | 0.000              |
| BST2               | 0.468             | 0.298            | -0.654       | 0.000          | 0.000                 | -0.670     | 0.000              |
| C10orf99           | 0.442             | 0.654            | 0.564        | 0.000          | 0.000                 | -0.586     | 0.000              |
| C3orf14            | 0.414             | 0.524            | 0.340        | 0.000          | 0.000                 | -0.809     | 0.000              |
| C6orf15            | 0.807             | 0.715            | -0.174       | 0.000          | 0.000                 | -0.547     | 0.000              |
| CADPS              | 0.203             | 0.178            | -0.188       | 0.000          | 0.040                 | -0.576     | 0.000              |
| CAPN8              | 0.908             | 0.571            | -0.671       | 0.000          | 0.000                 | -0.505     | 0.000              |
| CD40               | 0.226             | 0.480            | 1.091        | 0.000          | 0.000                 | -0.502     | 0.000              |
| CDHR1              | 0.128             | 0.190            | 0.573        | 0.000          | 0.000                 | -0.583     | 0.000              |
| CDK20              | 0.141             | 0.118            | -0.248       | 0.000          | 0.000                 | -0.611     | 0.000              |
| CEACAM6            | 0.386             | 0.251            | -0.619       | 0.000          | 0.000                 | -0.635     | 0.000              |
| CEL                | 0.629             | 0.504            | -0.319       | 0.000          | 0.001                 | -0.795     | 0.000              |
| CELP               | 0.747             | 0.535            | -0.480       | 0.000          | 0.000                 | -0.704     | 0.000              |
| CFTR               | 0.136             | 0.099            | -0.454       | 0.000          | 0.000                 | -0.519     | 0.000              |
| CHFR               | 0.040             | 0.239            | 2.560        | 0.000          | 0.000                 | -0.839     | 0.000              |
| CIDEB              | 0.497             | 0.636            | 0.354        | 0.000          | 0.000                 | -0.517     | 0.000              |
| DAPP1              | 0.584             | 0.416            | -0.490       | 0.000          | 0.000                 | -0.704     | 0.000              |
| DNAJC15            | 0.787             | 0.693            | -0.183       | 0.000          | 0.000                 | -0.561     | 0.000              |
| ECHDC3             | 0.379             | 0.500            | 0.398        | 0.000          | 0.002                 | -0.689     | 0.000              |
| ELAVL2             | 0.065             | 0.264            | 2.013        | 0.000          | 0.000                 | -0.514     | 0.000              |
| ELF5               | 0.729             | 0.602            | -0.277       | 0.000          | 0.000                 | -0.789     | 0.000              |
| ENPP3              | 0.679             | 0.768            | 0.177        | 0.000          | 0.000                 | -0.630     | 0.000              |
| EREG               | 0.434             | 0.332            | -0.385       | 0.000          | 0.000                 | -0.776     | 0.000              |
| FAM131A            | 0.364             | 0.391            | 0.102        | 0.000          | 0.000                 | -0.557     | 0.000              |
| FAM155B            | 0.234             | 0.398            | 0.766        | 0.000          | 0.002                 | -0.573     | 0.000              |
| FAM3D              | 0.470             | 0.411            | -0.195       | 0.000          | 0.007                 | -0.586     | 0.000              |
| FCGBP              | 0.761             | 0.693            | -0.134       | 0.000          | 0.000                 | -0.530     | 0.000              |
| FGF2               | 0.626             | 0.739            | 0.238        | 0.000          | 0.000                 | -0.545     | 0.000              |
| FLJ32063           | 0.145             | 0.327            | 1.173        | 0.000          | 0.000                 | -0.731     | 0.000              |
| FUZ                | 0.046             | 0.173            | 1.926        | 0.000          | 0.000                 | -0.651     | 0.000              |
| FZD10              | 0.161             | 0.341            | 1.080        | 0.000          | 0.000                 | -0.578     | 0.000              |
| GBGT1              | 0.513             | 0.642            | 0.325        | 0.000          | 0.000                 | -0.576     | 0.000              |
| GIPC2              | 0.234             | 0.184            | -0.346       | 0.000          | 0.000                 | -0.532     | 0.000              |
| GPX2               | 0.603             | 0.450            | -0.422       | 0.000          | 0.000                 | -0.543     | 0.000              |
| GPX7               | 0.272             | 0.419            | 0.626        | 0.000          | 0.000                 | -0.607     | 0.000              |
| GYPC               | 0.534             | 0.654            | 0.293        | 0.000          | 0.000                 | -0.533     | 0.000              |
| HABP2              | 0.840             | 0.670            | -0.325       | 0.000          | 0.000                 | -0.601     | 0.000              |
| HNF4A              | 0.427             | 0.323            | -0.402       | 0.000          | 0.000                 | -0.530     | 0.000              |
| HYDIN              | 0.398             | 0.566            | 0.510        | 0.000          | 0.000                 | -0.561     | 0.000              |
| IFITM1             | 0.593             | 0.398            | -0.577       | 0.000          | 0.000                 | -0.684     | 0.000              |
| INPP1              | 0.562             | 0.446            | -0.334       | 0.000          | 0.000                 | -0.522     | 0.000              |
| INPP5D             | 0.587             | 0.377            | -0.639       | 0.000          | 0.000                 | -0.769     | 0.000              |
| IRAK3              | 0.372             | 0.477            | 0.358        | 0.000          | 0.000                 | -0.583     | 0.000              |

|           |       |       |        |       |       |        |       |
|-----------|-------|-------|--------|-------|-------|--------|-------|
| IRX2      | 0.184 | 0.403 | 1.130  | 0.000 | 0.000 | -0.635 | 0.000 |
| KIF25     | 0.796 | 0.634 | -0.330 | 0.000 | 0.023 | -0.613 | 0.000 |
| KRBA1     | 0.456 | 0.702 | 0.621  | 0.000 | 0.000 | -0.693 | 0.000 |
| KRT20     | 0.517 | 0.369 | -0.485 | 0.000 | 0.000 | -0.560 | 0.000 |
| KRT23     | 0.763 | 0.546 | -0.484 | 0.000 | 0.000 | -0.559 | 0.000 |
| KRT7      | 0.448 | 0.604 | 0.430  | 0.000 | 0.000 | -0.531 | 0.000 |
| LCMT2     | 0.059 | 0.094 | 0.686  | 0.000 | 0.015 | -0.522 | 0.000 |
| LOC286467 | 0.561 | 0.326 | -0.784 | 0.000 | 0.000 | -0.549 | 0.000 |
| LRRC4     | 0.078 | 0.444 | 2.508  | 0.000 | 0.000 | -0.552 | 0.000 |
| LY6G6D    | 0.458 | 0.345 | -0.407 | 0.000 | 0.000 | -0.728 | 0.000 |
| MEIS3P1   | 0.617 | 0.703 | 0.188  | 0.000 | 0.000 | -0.629 | 0.000 |
| MIA       | 0.874 | 0.628 | -0.477 | 0.000 | 0.000 | -0.583 | 0.000 |
| NINL      | 0.107 | 0.302 | 1.501  | 0.000 | 0.005 | -0.623 | 0.000 |
| NMRAL1    | 0.146 | 0.121 | -0.270 | 0.000 | 0.000 | -0.549 | 0.000 |
| NPC1L1    | 0.758 | 0.681 | -0.154 | 0.000 | 0.000 | -0.634 | 0.000 |
| NUDT12    | 0.297 | 0.247 | -0.266 | 0.000 | 0.006 | -0.670 | 0.000 |
| PGC       | 0.833 | 0.729 | -0.193 | 0.000 | 0.000 | -0.509 | 0.000 |
| PHYHIPL   | 0.095 | 0.290 | 1.611  | 0.000 | 0.000 | -0.531 | 0.000 |
| PIGR      | 0.389 | 0.572 | 0.555  | 0.000 | 0.000 | -0.742 | 0.000 |
| PIPOX     | 0.447 | 0.216 | -1.047 | 0.000 | 0.000 | -0.629 | 0.000 |
| PKIA      | 0.086 | 0.380 | 2.146  | 0.000 | 0.000 | -0.657 | 0.000 |
| PNPLA4    | 0.173 | 0.167 | -0.050 | 0.000 | 0.000 | -0.508 | 0.000 |
| PRKY      | 0.349 | 0.254 | -0.455 | 0.000 | 0.015 | -0.772 | 0.000 |
| PTK7      | 0.249 | 0.337 | 0.435  | 0.000 | 0.000 | -0.590 | 0.000 |
| QPCT      | 0.417 | 0.367 | -0.186 | 0.000 | 0.000 | -0.525 | 0.000 |
| RAB32     | 0.212 | 0.181 | -0.228 | 0.000 | 0.000 | -0.567 | 0.000 |
| RARRES3   | 0.681 | 0.524 | -0.379 | 0.000 | 0.000 | -0.562 | 0.000 |
| RBP1      | 0.415 | 0.536 | 0.368  | 0.000 | 0.000 | -0.614 | 0.000 |
| RNF212    | 0.590 | 0.706 | 0.257  | 0.000 | 0.000 | -0.570 | 0.000 |
| RPL39L    | 0.099 | 0.383 | 1.957  | 0.000 | 0.000 | -0.674 | 0.000 |
| SERP2     | 0.321 | 0.447 | 0.479  | 0.000 | 0.006 | -0.818 | 0.000 |
| SERPINA1  | 0.528 | 0.417 | -0.340 | 0.000 | 0.000 | -0.609 | 0.000 |
| SLC43A3   | 0.408 | 0.554 | 0.440  | 0.000 | 0.000 | -0.615 | 0.000 |
| SPAG16    | 0.144 | 0.238 | 0.728  | 0.000 | 0.000 | -0.768 | 0.000 |
| SRPX2     | 0.682 | 0.505 | -0.434 | 0.000 | 0.000 | -0.698 | 0.000 |
| SULT4A1   | 0.291 | 0.506 | 0.799  | 0.000 | 0.000 | -0.531 | 0.000 |
| TBX18     | 0.172 | 0.475 | 1.466  | 0.000 | 0.000 | -0.738 | 0.000 |
| TMEM106A  | 0.078 | 0.302 | 1.959  | 0.000 | 0.028 | -0.700 | 0.000 |
| TMEM173   | 0.235 | 0.205 | -0.201 | 0.000 | 0.036 | -0.644 | 0.000 |
| TMEM220   | 0.442 | 0.636 | 0.524  | 0.000 | 0.000 | -0.589 | 0.000 |
| TMEM71    | 0.728 | 0.617 | -0.239 | 0.000 | 0.019 | -0.603 | 0.000 |
| VSIG2     | 0.550 | 0.684 | 0.315  | 0.000 | 0.000 | -0.602 | 0.000 |
| WDR35     | 0.147 | 0.131 | -0.167 | 0.000 | 0.000 | -0.608 | 0.000 |
| ZFP28     | 0.070 | 0.403 | 2.524  | 0.000 | 0.000 | -0.746 | 0.000 |
| ZFP82     | 0.140 | 0.448 | 1.681  | 0.000 | 0.000 | -0.714 | 0.000 |
| ZIK1      | 0.400 | 0.621 | 0.635  | 0.000 | 0.000 | -0.536 | 0.000 |
| ZNF134    | 0.044 | 0.281 | 2.681  | 0.000 | 0.000 | -0.752 | 0.000 |
| ZNF141    | 0.086 | 0.175 | 1.020  | 0.000 | 0.002 | -0.733 | 0.000 |
| ZNF256    | 0.049 | 0.274 | 2.471  | 0.000 | 0.000 | -0.789 | 0.000 |
| ZNF264    | 0.393 | 0.477 | 0.279  | 0.000 | 0.000 | -0.622 | 0.000 |
| ZNF285    | 0.119 | 0.354 | 1.574  | 0.000 | 0.000 | -0.790 | 0.000 |
| ZNF287    | 0.083 | 0.214 | 1.361  | 0.000 | 0.000 | -0.616 | 0.000 |
| ZNF300    | 0.343 | 0.506 | 0.559  | 0.000 | 0.000 | -0.795 | 0.000 |
| ZNF304    | 0.108 | 0.405 | 1.902  | 0.000 | 0.000 | -0.743 | 0.000 |
| ZNF331    | 0.378 | 0.556 | 0.556  | 0.000 | 0.000 | -0.616 | 0.000 |
| ZNF334    | 0.304 | 0.606 | 0.995  | 0.000 | 0.000 | -0.541 | 0.000 |

|         |       |       |       |       |       |        |       |
|---------|-------|-------|-------|-------|-------|--------|-------|
| ZNF347  | 0.164 | 0.381 | 1.215 | 0.000 | 0.000 | -0.701 | 0.000 |
| ZNF354C | 0.079 | 0.323 | 2.024 | 0.000 | 0.000 | -0.611 | 0.000 |
| ZNF415  | 0.274 | 0.500 | 0.868 | 0.000 | 0.000 | -0.680 | 0.000 |
| ZNF43   | 0.147 | 0.431 | 1.549 | 0.000 | 0.000 | -0.778 | 0.000 |
| ZNF461  | 0.136 | 0.294 | 1.108 | 0.000 | 0.000 | -0.623 | 0.000 |
| ZNF471  | 0.155 | 0.457 | 1.560 | 0.000 | 0.000 | -0.630 | 0.000 |
| ZNF480  | 0.057 | 0.113 | 0.982 | 0.000 | 0.009 | -0.734 | 0.000 |
| ZNF506  | 0.263 | 0.305 | 0.215 | 0.000 | 0.002 | -0.547 | 0.000 |
| ZNF525  | 0.157 | 0.265 | 0.752 | 0.000 | 0.000 | -0.666 | 0.000 |
| ZNF528  | 0.116 | 0.412 | 1.829 | 0.000 | 0.000 | -0.713 | 0.000 |
| ZNF529  | 0.217 | 0.390 | 0.847 | 0.000 | 0.000 | -0.641 | 0.000 |
| ZNF543  | 0.047 | 0.320 | 2.776 | 0.000 | 0.000 | -0.770 | 0.000 |
| ZNF547  | 0.040 | 0.128 | 1.675 | 0.000 | 0.000 | -0.657 | 0.000 |
| ZNF549  | 0.264 | 0.513 | 0.957 | 0.000 | 0.000 | -0.807 | 0.000 |
| ZNF568  | 0.127 | 0.458 | 1.856 | 0.000 | 0.000 | -0.551 | 0.000 |
| ZNF569  | 0.201 | 0.387 | 0.942 | 0.000 | 0.000 | -0.664 | 0.000 |
| ZNF570  | 0.172 | 0.364 | 1.083 | 0.000 | 0.000 | -0.747 | 0.000 |
| ZNF582  | 0.188 | 0.517 | 1.458 | 0.000 | 0.000 | -0.600 | 0.000 |
| ZNF583  | 0.063 | 0.150 | 1.244 | 0.000 | 0.005 | -0.627 | 0.000 |
| ZNF625  | 0.044 | 0.443 | 3.329 | 0.000 | 0.000 | -0.563 | 0.000 |
| ZNF655  | 0.042 | 0.229 | 2.435 | 0.000 | 0.000 | -0.815 | 0.000 |
| ZNF662  | 0.423 | 0.636 | 0.588 | 0.000 | 0.000 | -0.621 | 0.000 |
| ZNF677  | 0.381 | 0.615 | 0.691 | 0.000 | 0.000 | -0.501 | 0.000 |
| ZNF682  | 0.056 | 0.236 | 2.066 | 0.000 | 0.000 | -0.768 | 0.000 |
| ZNF75A  | 0.245 | 0.513 | 1.067 | 0.000 | 0.000 | -0.550 | 0.000 |
| ZNF772  | 0.266 | 0.451 | 0.763 | 0.000 | 0.000 | -0.618 | 0.000 |
| ZNF793  | 0.043 | 0.424 | 3.290 | 0.000 | 0.000 | -0.737 | 0.000 |
| ZNF813  | 0.093 | 0.274 | 1.551 | 0.000 | 0.000 | -0.711 | 0.000 |
| ZNF829  | 0.127 | 0.458 | 1.856 | 0.000 | 0.000 | -0.555 | 0.000 |
| ZNF83   | 0.137 | 0.258 | 0.916 | 0.000 | 0.001 | -0.565 | 0.000 |
| ZNF844  | 0.071 | 0.141 | 0.986 | 0.000 | 0.002 | -0.604 | 0.000 |
| ZNF85   | 0.285 | 0.537 | 0.917 | 0.000 | 0.000 | -0.599 | 0.000 |
| ZNF880  | 0.125 | 0.419 | 1.741 | 0.000 | 0.000 | -0.576 | 0.000 |
| ZSCAN18 | 0.373 | 0.502 | 0.429 | 0.000 | 0.000 | -0.660 | 0.000 |
| ZSCAN23 | 0.144 | 0.477 | 1.729 | 0.000 | 0.000 | -0.579 | 0.000 |

---

**Table S2. Identificaion of six methylation-driven genes by multivariable Cox regression analysis.**

| <b>Gene symbol</b> | <b>Coefficient<sup>a</sup></b> | <b>HR</b> | <b>HR(95%Low)</b> | <b>HR(95%High)</b> | <b>P -value<sup>a</sup></b> |
|--------------------|--------------------------------|-----------|-------------------|--------------------|-----------------------------|
| ANXA9              | 0.261                          | 1.298     | 1.038             | 1.623              | 0.022                       |
| BATF               | 0.247                          | 1.281     | 1.084             | 1.513              | 0.004                       |
| PHYHIPL            | 0.136                          | 1.146     | 1.035             | 1.268              | 0.009                       |
| PNPLA4             | -0.224                         | 0.799     | 0.658             | 0.970              | 0.023                       |
| RBP1               | -0.232                         | 0.793     | 0.688             | 0.914              | 0.001                       |
| SERPINA1           | -0.195                         | 0.823     | 0.713             | 0.950              | 0.008                       |

<sup>a</sup>Derived from the multivariable Cox regression analysis in the training set.

**Table S3. Compared the overall survival prediction and AUC values of 63 different combined models in the training set.**

| Combined Model    | Overall Survival |            |             |         |                  |           |
|-------------------|------------------|------------|-------------|---------|------------------|-----------|
|                   | HR               | HR(95%Low) | HR(95%High) | P-value | AUC <sup>a</sup> |           |
| One Gene Model    | ANXA9            | 1.420      | 0.929       | 2.173   | 0.104            | 0.569 (5) |
|                   | BATF             | 1.763      | 1.144       | 2.717   | 0.009            | 0.701     |
|                   | PHYHIPL          | 1.358      | 0.890       | 2.070   | 0.154            | 0.677 (6) |
|                   | PNPLA4           | 1.466      | 0.960       | 2.239   | 0.075            | 0.731     |
|                   | RBP1             | 1.103      | 0.726       | 1.676   | 0.647            | 0.652     |
|                   | SERPINA1         | 1.730      | 1.128       | 2.653   | 0.011            | 0.608     |
| Two Genes Model   | A-B              | 2.184      | 1.404       | 3.398   | 0.000            | 0.645     |
|                   | A-P1             | 1.583      | 1.032       | 2.428   | 0.034            | 0.636 (6) |
|                   | A-P2             | 1.845      | 1.197       | 2.843   | 0.005            | 0.660     |
|                   | A-R              | 1.628      | 1.065       | 2.487   | 0.023            | 0.608 (5) |
|                   | A-S              | 1.860      | 1.207       | 2.865   | 0.004            | 0.567     |
|                   | B-P1             | 2.116      | 1.367       | 3.277   | 0.001            | 0.699     |
|                   | B-P2             | 1.883      | 1.222       | 2.901   | 0.004            | 0.772     |
|                   | B-R              | 1.728      | 1.126       | 2.653   | 0.011            | 0.811     |
|                   | B-S              | 2.305      | 1.475       | 3.600   | 0.000            | 0.724     |
|                   | P1-R             | 1.563      | 1.025       | 2.384   | 0.004            | 0.671 (6) |
|                   | P1-S             | 1.637      | 1.069       | 2.506   | 0.022            | 0.649 (6) |
|                   | P2-S             | 1.966      | 1.276       | 3.028   | 0.002            | 0.705     |
|                   | P2-R             | 1.592      | 1.043       | 2.430   | 0.030            | 0.752     |
|                   | P1-P2            | 1.587      | 1.036       | 2.430   | 0.032            | 0.710     |
|                   | R-S              | 1.716      | 1.121       | 2.627   | 0.012            | 0.689     |
| Three Genes Model | A-B-P1           | 1.991      | 1.288       | 3.076   | 0.002            | 0.673 (6) |
|                   | A-B-P2           | 2.527      | 1.598       | 3.997   | 0.000            | 0.742     |
|                   | A-B-R            | 2.227      | 1.437       | 3.451   | 0.000            | 0.704     |
|                   | A-B-S            | 2.414      | 1.539       | 3.785   | 0.000            | 0.691     |
|                   | A-P1-P2          | 1.827      | 1.181       | 2.826   | 0.006            | 0.664     |
|                   | A-P1-R           | 1.973      | 1.285       | 3.031   | 0.002            | 0.683 (5) |
|                   | A-P1-S           | 1.687      | 1.100       | 2.589   | 0.015            | 0.645     |
|                   | A-P2-R           | 1.940      | 1.261       | 2.982   | 0.002            | 0.670     |
|                   | A-P2-S           | 2.120      | 1.364       | 3.295   | 0.001            | 0.666     |
|                   | A-R-S            | 2.015      | 1.309       | 3.101   | 0.001            | 0.625     |
|                   | B-P1-P2          | 1.872      | 1.212       | 2.891   | 0.004            | 0.803     |
|                   | B-P1-R           | 1.692      | 1.101       | 2.601   | 0.015            | 0.832     |
|                   | B-P1-S           | 2.445      | 1.562       | 3.826   | 0.000            | 0.728     |
|                   | B-P2-R           | 1.723      | 1.122       | 2.648   | 0.012            | 0.823     |
|                   | B-P2-S           | 2.559      | 1.625       | 4.031   | 0.000            | 0.776     |
|                   | B-R-S            | 2.445      | 1.564       | 3.823   | 0.000            | 0.793     |
|                   | P1-P2-R          | 2.037      | 1.323       | 3.139   | 0.001            | 0.749 (7) |
|                   | P1-P2-S          | 1.977      | 1.279       | 3.056   | 0.002            | 0.698     |
|                   | P1-R-S           | 1.928      | 1.255       | 2.962   | 0.002            | 0.705     |
|                   | P2-R-S           | 1.629      | 1.065       | 2.493   | 0.023            | 0.746     |
|                   | Four Genes Model | P1-P2-R-S  | 1.902       | 1.240   | 2.918            | 0.003     |
| B-P2-R-S          |                  | 2.739      | 1.736       | 4.320   | 0.000            | 0.822     |
| B-P1-R-S          |                  | 2.301      | 1.477       | 3.583   | 0.000            | 0.808     |
| B-P1-P2-S         |                  | 2.459      | 1.567       | 3.860   | 0.000            | 0.780     |
| B-P1-P2-R         |                  | 2.184      | 1.404       | 3.396   | 0.000            | 0.876     |
| A-P2-R-S          |                  | 2.299      | 1.483       | 3.565   | 0.000            | 0.693     |
| A-P1-R-S          |                  | 2.285      | 1.477       | 3.534   | 0.000            | 0.660     |
| A-P1-P2-S         |                  | 1.926      | 1.247       | 2.977   | 0.003            | 0.669     |
| A-P1-P2-R         |                  | 2.125      | 1.378       | 3.275   | 0.000            | 0.707     |
| A-B-P2-S          |                  | 2.443      | 1.552       | 3.845   | 0.000            | 0.749     |
| A-B-P2-R          | 2.278            | 1.468      | 3.537       | 0.000   | 0.763            |           |

|                  |               |       |       |       |       |       |
|------------------|---------------|-------|-------|-------|-------|-------|
|                  | A-B-P1-S      | 2.296 | 1.477 | 3.569 | 0.000 | 0.703 |
|                  | A-B-P1-R      | 2.365 | 1.514 | 3.693 | 0.000 | 0.745 |
|                  | A-B-R-S       | 2.617 | 1.673 | 4.093 | 0.000 | 0.735 |
|                  | A-B-P1-P2     | 2.703 | 1.707 | 4.279 | 0.000 | 0.754 |
| Five Genes Model | B-P1-P2-R-S   | 2.227 | 1.435 | 3.454 | 0.000 | 0.840 |
|                  | A-P1-P2-R-S   | 1.819 | 1.186 | 2.790 | 0.005 | 0.724 |
|                  | A-B-P2-R-S    | 3.240 | 2.035 | 5.160 | 0.000 | 0.778 |
|                  | A-B-P1-R-S    | 2.809 | 1.779 | 4.435 | 0.000 | 0.761 |
|                  | A-B-P1-P2-S   | 2.533 | 1.608 | 3.989 | 0.000 | 0.762 |
|                  | A-B-P1-P2-R   | 2.573 | 1.645 | 4.023 | 0.000 | 0.804 |
| Six Genes Model  | A-B-P1-P2-R-S | 2.648 | 1.688 | 4.155 | 0.000 | 0.796 |

Note: "A" means ANXA9, "B" means BATF, "P1" means PHYHIPL, "P2" means PNPLA4, "R" means RBP1, "S" means SEPRINA1. "(5)" means predicting 5-year overall survival of patients

<sup>a</sup>=AUC based on the ROC curves for the sensitivity and specificity of different signatures in predicting 9-year overall survival of patients.



**Table S4. The C-index of TNM staging system and nomograms.**

| <b>Models</b> | <b>Training set (N=367)</b> |                 | <b>Testing set (N=355)</b> |                 |
|---------------|-----------------------------|-----------------|----------------------------|-----------------|
|               | C-index<br>(95%CI)          | <i>P</i> -value | C-index<br>(95%CI)         | <i>P</i> -value |
| TNM staging   | 0.719<br>(0.654-0.783)      | <0.001          | 0.706<br>(0.669-0.743)     | <0.001          |
| Nomogram      | 0.747<br>(0.687-0.807)      | <0.001          | 0.707<br>(0.670-0.743)     | <0.001          |

**Table S5. Compared the prognostic effect of four methylation-driven genes signature with other partially known biomarkers.**

| Signature      | AUC   | 95% CI of AUC | Type           | P value <sup>a</sup> | Ref <sup>b</sup> |
|----------------|-------|---------------|----------------|----------------------|------------------|
| This study     | 0.794 | 0.681-0.907   | Protein coding |                      | This study       |
| Five-gene mRNA | 0.671 | 0.529-0.813   | Protein coding | 0.182                | [1]              |
| Four-gene mRNA | 0.658 | 0.501-0.816   | Protein coding | 0.211                | [2]              |
| Two-gene mRNA  | 0.579 | 0.423-0.735   | Protein coding | 0.040                | [3]              |
| UCA1           | 0.605 | 0.456-0.754   | Protein coding | 0.030                | [4]              |
| S100A14        | 0.523 | 0.382-0.660   | Protein coding | 0.004                | [5]              |
| SERPINB9       | 0.589 | 0.437-0.742   | Protein coding | 0.009                | [6]              |
| MMP19          | 0.593 | 0.440-0.746   | Protein coding | 0.025                | [7]              |
| ADAMTS5        | 0.521 | 0.375-0.668   | Protein coding | 0.001                | [8]              |
| CNPY2          | 0.627 | 0.495-0.760   | Protein coding | 0.064                | [9]              |
| HSF4           | 0.550 | 0.403-0.697   | Protein coding | 0.008                | [10]             |
| NDRG2          | 0.598 | 0.437-0.758   | Protein coding | 0.028                | [11]             |
| SLC2A3         | 0.634 | 0.495-0.773   | Protein coding | 0.087                | [12]             |
| RAI2           | 0.697 | 0.571-0.823   | Methylation    | 0.223                | [13]             |
| ZNF331         | 0.556 | 0.377-0.734   | Methylation    | 0.018                | [14]             |

<sup>a</sup>:in the statistical comparison (Z test) between AUC value of corresponding signature and " this study" signature.

<sup>b</sup>:Additional References:

- [1]. Sun G, Li Y, Peng Y, et al. Identification of a five-gene signature with prognostic value in colorectal cancer. *Journal of cellular physiology*. 2019;234(4):3829-36.
- [2]. Li X, Zhang Q, Zhao L, et al. A Combined four-mRNA Signature Associated with Lymphatic Metastasis for Prognosis of Colorectal Cancer. *Journal of Cancer*. 2020;11(8):2139-49.
- [3]. Abdel Raouf SM, Ibrahim TR, Abdelaziz LA, et al. Prognostic Value of TWIST1 and EZH2 Expression in Colon Cancer. *Journal of gastrointestinal cancer*. 2019.
- [4]. Liu X, Liu X, Qiao T, et al. Prognostic and clinicopathological significance of long non-coding RNA UCA1 in colorectal cancer: Results from a meta-analysis. *Medicine*. 2019;98(48):e18031.
- [5]. Diamantopoulou A, Mantas D, Kostakis ID, et al. A Clinicopathological Analysis of S100A14 Expression in Colorectal Cancer. *In vivo (Athens, Greece)*. 2020;34(1):321-30.
- [6]. Vycital O, Pitule P, Hosek P, et al. Expression of Serpin B9 as a Prognostic Factor of Colorectal Cancer. *Anticancer research*. 2019;39(11):6063-6.
- [7]. Chen Z, Wu G, Ye F, et al. High expression of MMP19 is associated with poor prognosis in patients with colorectal cancer. *BMC cancer*. 2019;19(1):448.
- [8]. Li J, Liao Y, Huang J, et al. Epigenetic silencing of ADAMTS5 is associated with increased invasiveness and poor survival in patients with colorectal cancer. *Journal of cancer research and clinical oncology*. 2018;144(2):215-27.
- [9]. Peng J, Ou Q, Pan Z, Zhang R, Zhao Y, Deng Y, et al. Serum CNPY2 isoform 2 represents a novel biomarker for early detection of colorectal cancer. *Aging*. 2018;10(8):1921-31.
- [10]. Yang Y, Jin L, Zhang J, et al. High HSF4 expression is an independent indicator of poor overall survival and recurrence free survival in patients with primary colorectal cancer. *IUBMB life*. 2017;69(12):956-61.
- [11]. Chen W, Peng J, Ou Q, et al. Expression of NDRG2 in Human Colorectal Cancer and its Association with Prognosis. *Journal of Cancer*. 2019;10(15):3373-80.
- [12]. Kim E, Jung S, Park WS, et al. Upregulation of SLC2A3 gene and prognosis in colorectal carcinoma: analysis of TCGA data. *BMC cancer*. 2019;19(1):302.
- [13]. Yan W, Wu K, Herman JG, et al. Retinoic acid-induced 2 (RAI2) is a novel tumor suppressor, and promoter region methylation of RAI2 is a poor prognostic marker in colorectal cancer. *Clinical epigenetics*. 2018;10:69.
- [14]. Wang Y, He T, Herman JG, et al. Methylation of ZNF331 is an independent prognostic marker of colorectal cancer and promotes colorectal cancer growth. *Clinical epigenetics*. 2017;9:115.
